# Supplementary material for: Two Evolutionary Histories in the Genome of Rice: the Roles of Domestication Genes
Source: PLOS journal article supplement (doi:10.1371/journal.pgen.1002100), 2011-06-09

**Diversity at chromosome 1**

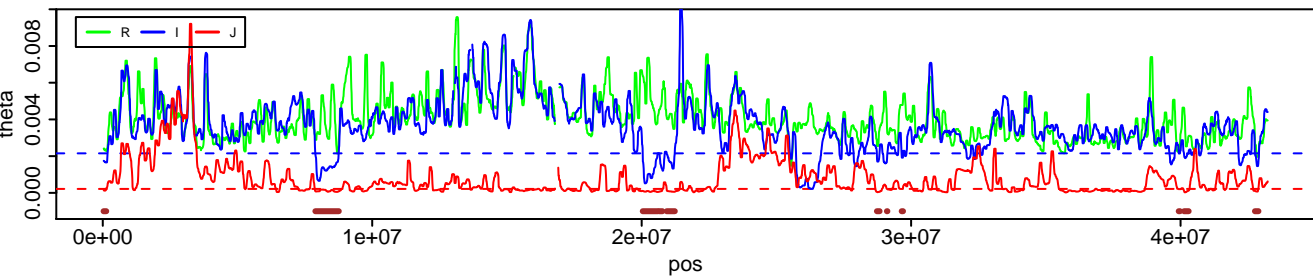

**Fst at chromosome 1**

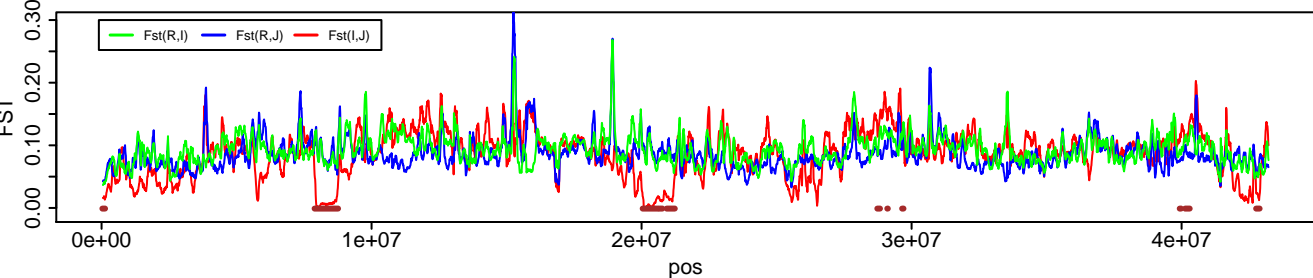

**Diversity at chromosome 2**

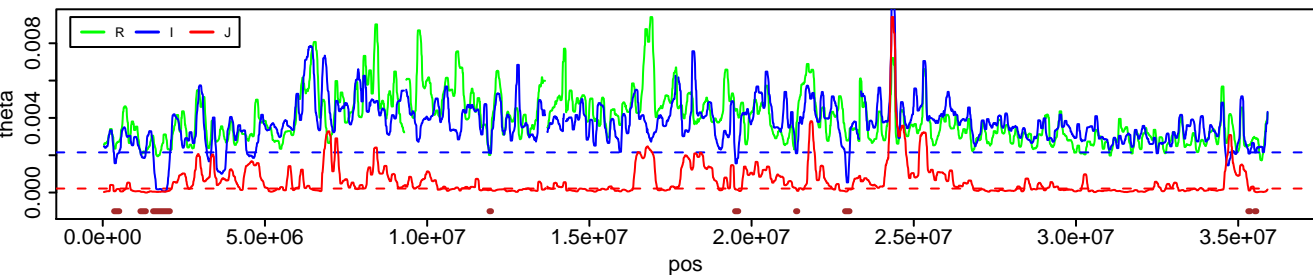

**Fst at chromosome 2**

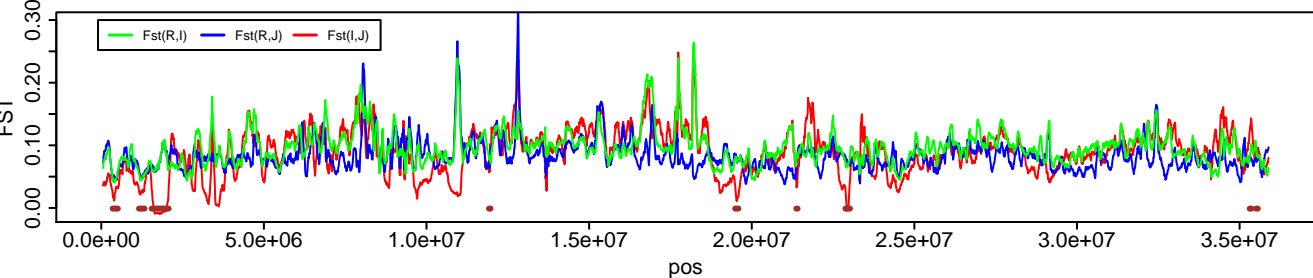

**Diversity at chromosome 3**

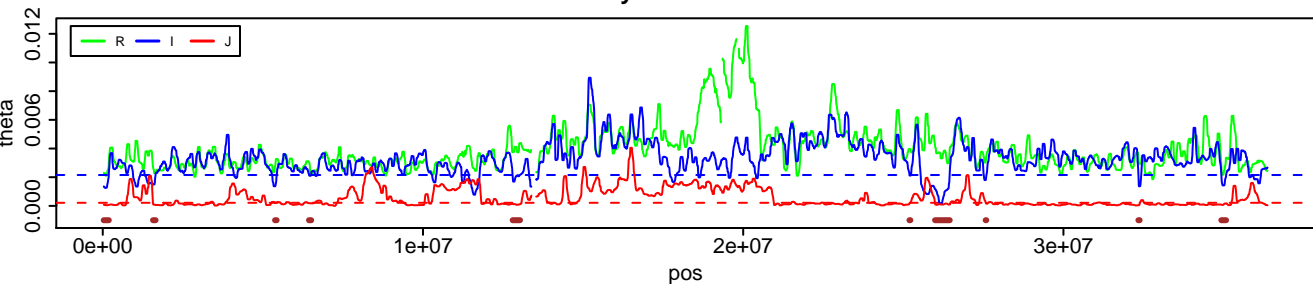

**Fst at chromosome 3**

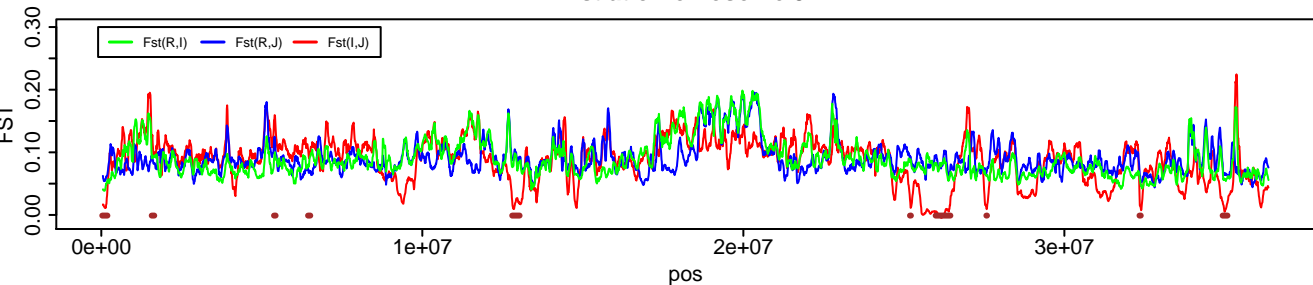

**Diversity at chromosome 4**

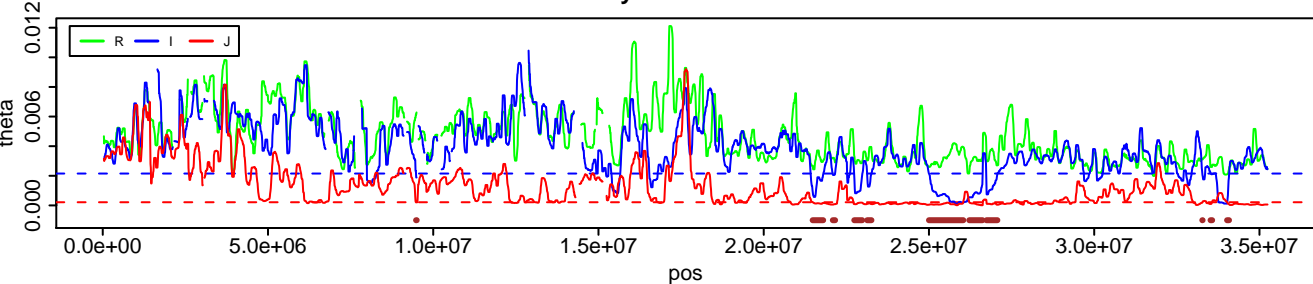

**Fst at chromosome 4**

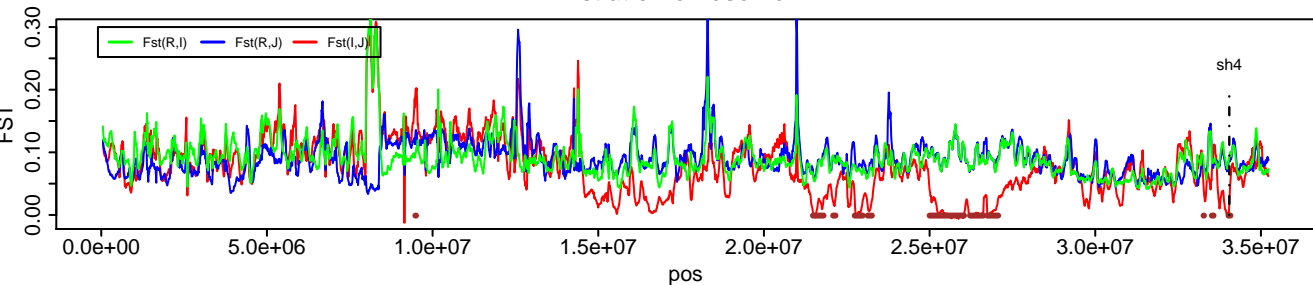

**Diversity at chromosome 5**

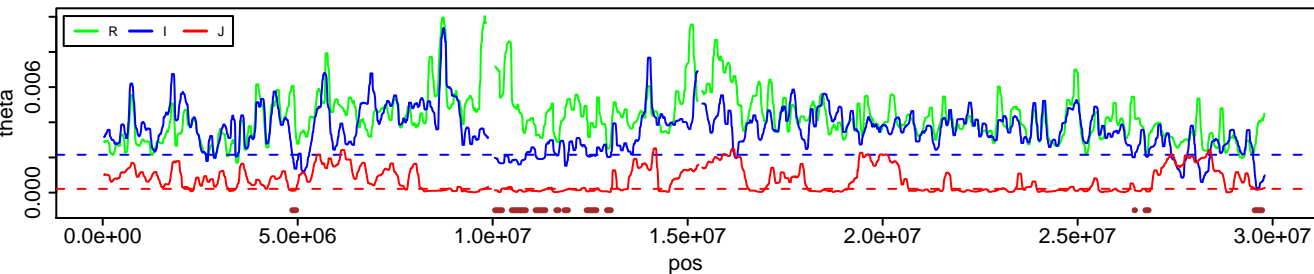

**Fst at chromosome 5**

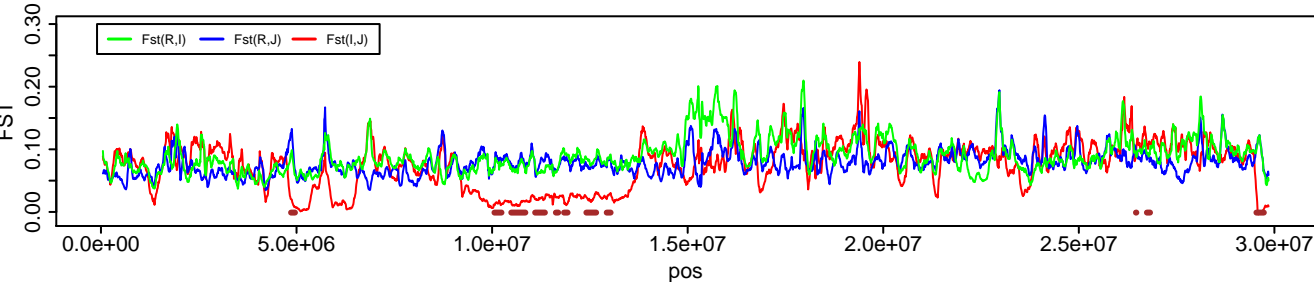

**Diversity at chromosome 6**

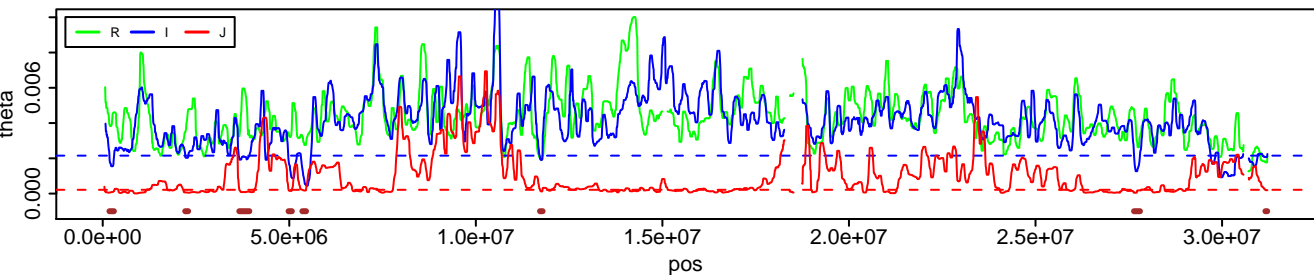

**Fst at chromosome 6**

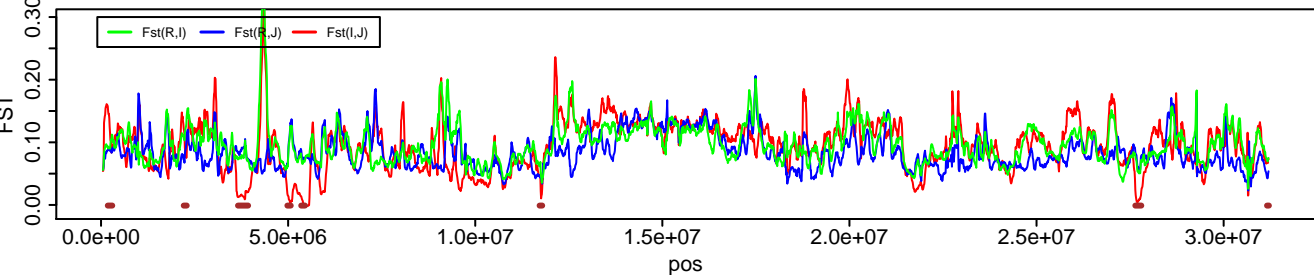

**Diversity at chromosome 7**

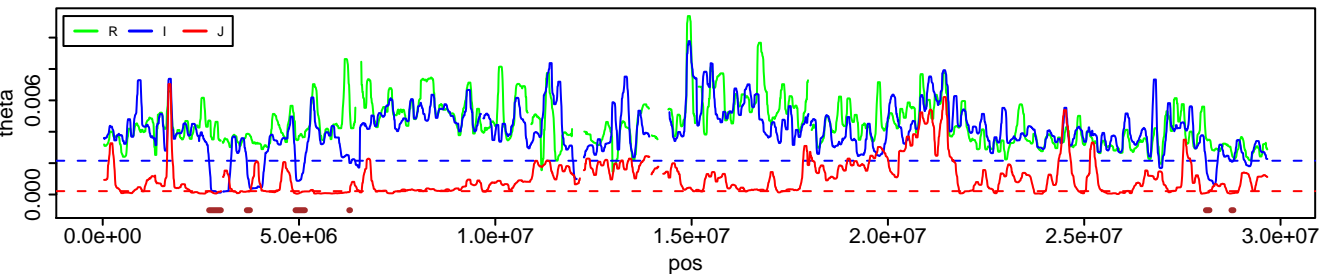

**Fst at chromosome 7**

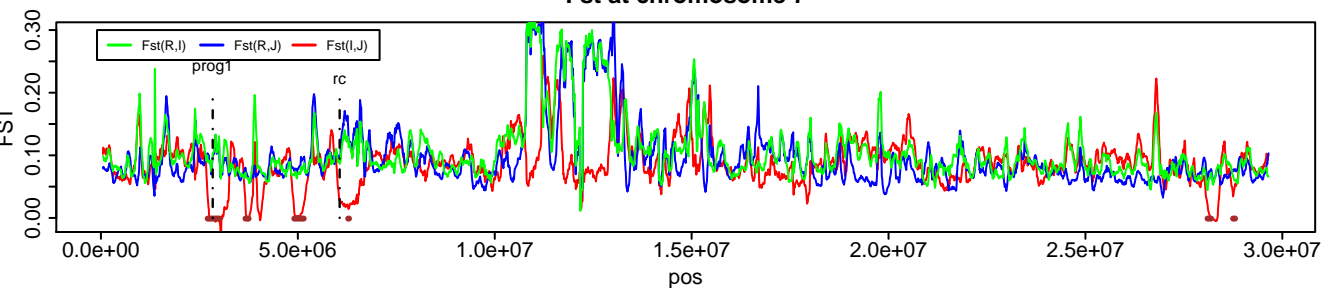

**Diversity at chromosome 8**

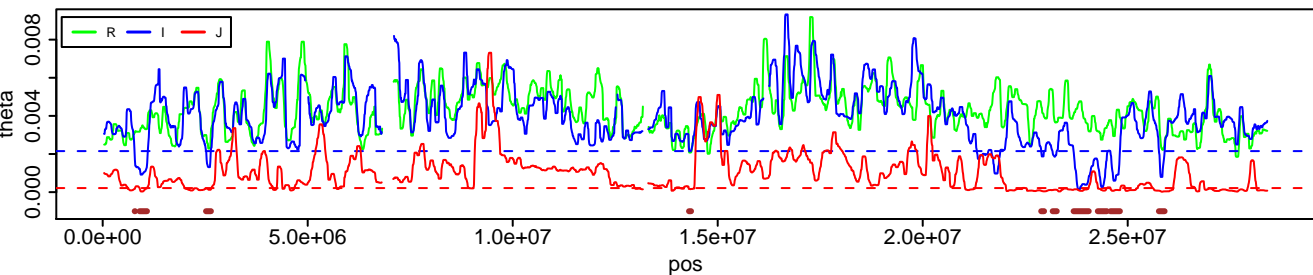

**Fst at chromosome 8**

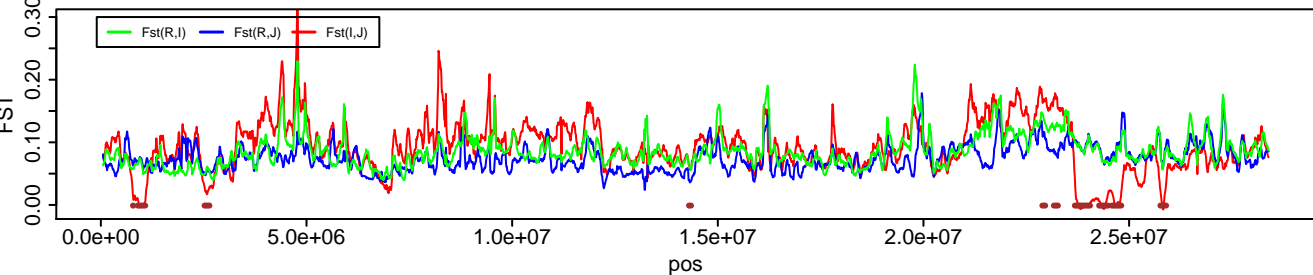

**Diversity at chromosome 9**

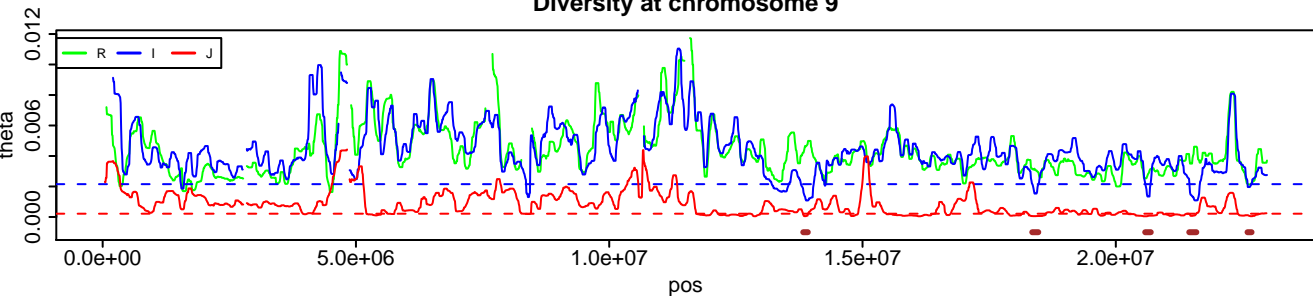

**Fst at chromosome 9**

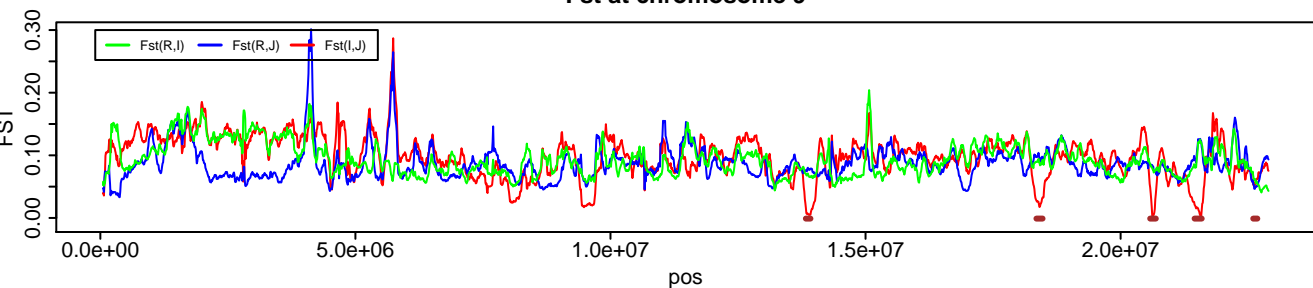

**Diversity at chromosome 10**

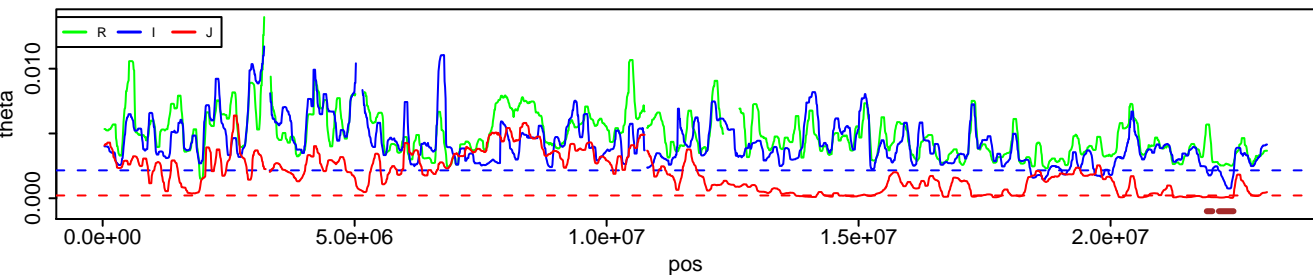

**Fst at chromosome 10**

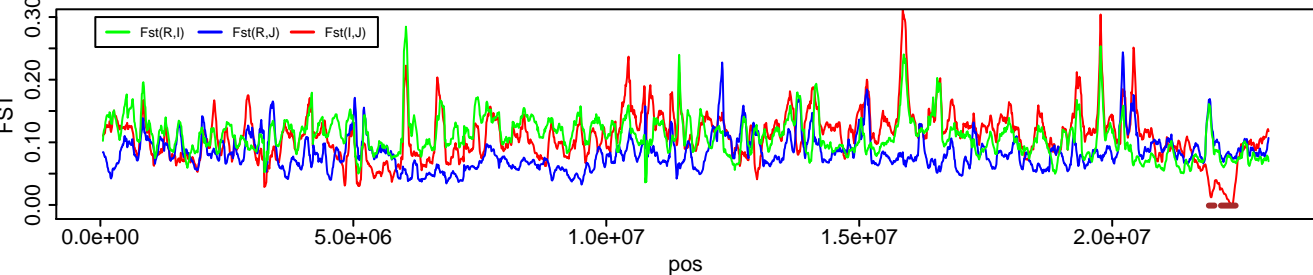

**Diversity at chromosome 11**

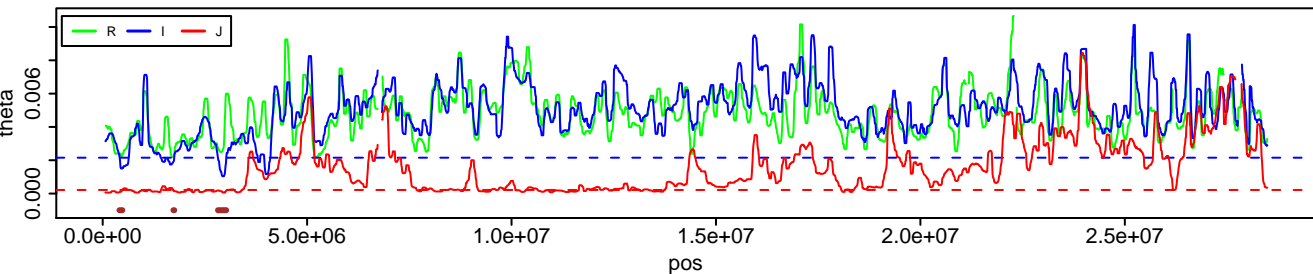

**Fst at chromosome 11**

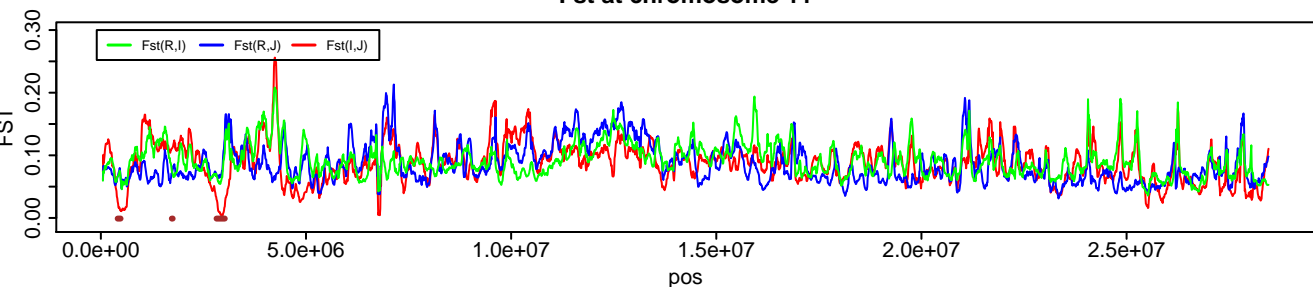

**Diversity at chromosome 12**

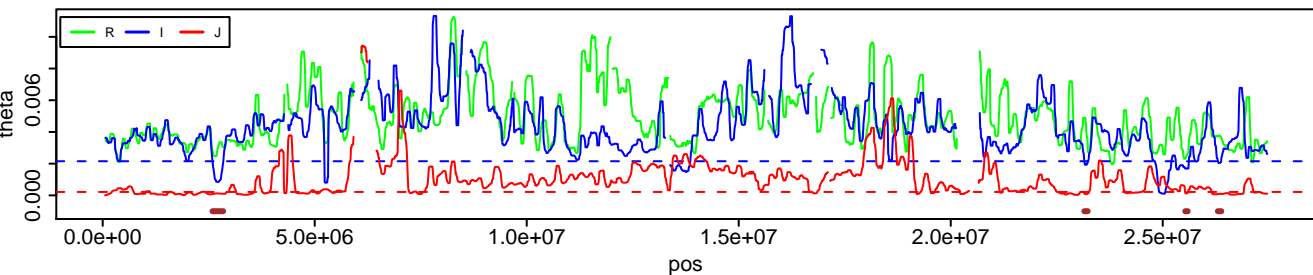

**Fst at chromosome 12**

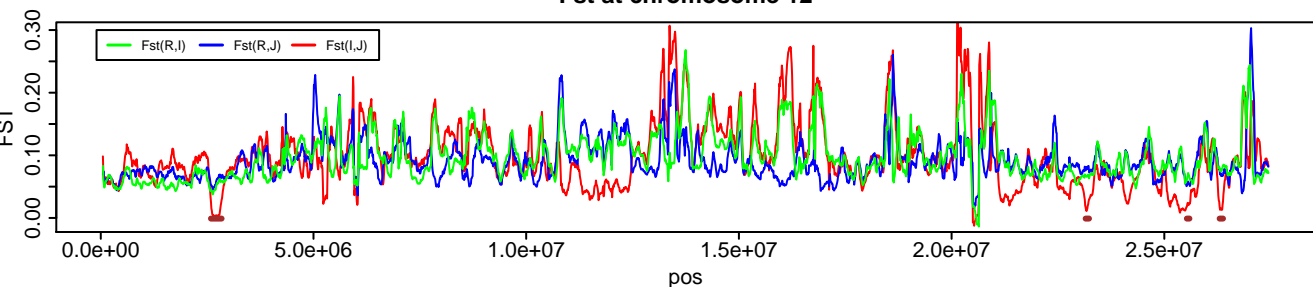

Supplement: S1 (10.1371/journal.pgen.1002100.s001) [file journal.pgen.1002100.s001.pdf › journal.pgen.1002100.s001.pdf]
