# Supplementary material for: Two Evolutionary Histories in the Genome of Rice: the Roles of Domestication Genes
Source: PLOS journal article supplement (doi:10.1371/journal.pgen.1002100), 2011-06-09

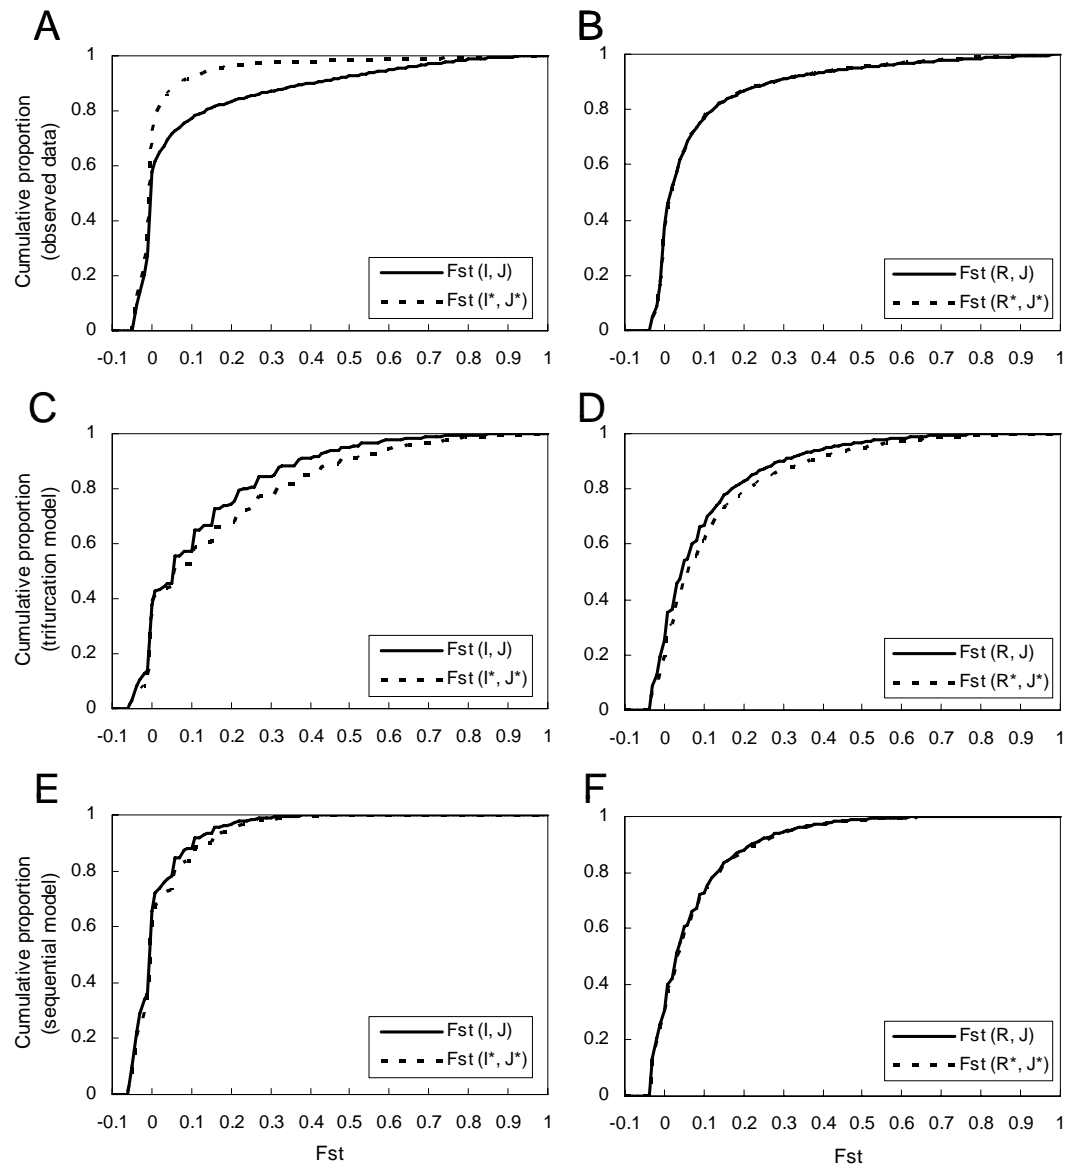

Supplement: S2 (10.1371/journal.pgen.1002100.s002) [file journal.pgen.1002100.s002.pdf › journal.pgen.1002100.s002.pdf]
